# Supplementary material
Source: PubMed Central journal article supplement (PMC3825303)
Supplement: supp_the2013-0061_Campone-13-61.pdf [file supp_the2013-0061_Campone-13-61.pdf]

## Overview

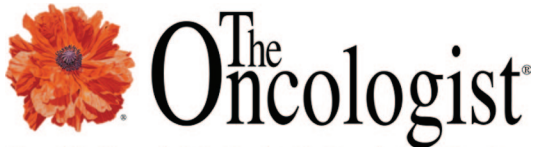

The official journal of the Society for Translational Oncology

**First Published Online October 8, 2013**

**DOI:** 10.1634/theoncologist.2013-0061

**Title:** A Double-Blind, Randomized Phase II Study to Evaluate the Safety and Efficacy of Acetyl-L-Carnitine in the Prevention of Sagopilone-Induced Peripheral Neuropathy (REASON)

**Authors:** Mario Campone<sup>1</sup>, Dominique Berton-Rigaud<sup>1</sup>, Florence Joly-Lobbedez<sup>2</sup>, Jean-Francois Baurain<sup>3</sup>, Frédéric Rolland<sup>1</sup>, Arnulf Stenzl<sup>4</sup>, Michel Fabbro<sup>5</sup>, Marjan van Dijk<sup>6</sup>, Jörg Pinkert<sup>7</sup>, Thomas Schmelter<sup>8</sup>, Natasja de Bont<sup>9</sup>, Patricia Pautier<sup>10</sup>

<sup>1</sup>Institut de Cancérologie de l'Ouest—René Gauducheau Centre de Recherche en Cancérologie, Nantes, France

<sup>2</sup>Centre François Baclesse, Caen, France

<sup>3</sup>Cancer Centre, Brussels Saint-Luc University Hospital, Brussels, Belgium

<sup>4</sup>University Hospital Tübingen, Tübingen, Germany

<sup>5</sup>Centre Val d'Aurelle—Paul Lamarque, Montpellier, France

<sup>6</sup>Department of Medical Oncology, Maastricht Teaching Hospital, Maastricht, The Netherlands

<sup>7</sup>Bayer HealthCare Pharmaceuticals, Leverkusen, Germany

<sup>8</sup>Bayer Pharma AG, Berlin, Germany

<sup>9</sup>Bayer HealthCare Pharmaceuticals, Mijdrecht, The Netherlands

<sup>10</sup>Institut GustaveRoussy, Villejuif, France

**ClinicalTrials.gov Identifier:** NCT00751205

**Sponsor(s):** Bayer HealthCare Pharmaceuticals

**Principal Investigator:** Mario Campone

**IRB Approved:** Yes

### Disclosures:

**Natasja de Bont, Marjan van Dijk, Mario Campone, Dominique Berton-Rigaud, Jean-Francois Baurain, Frédéric Rolland, Michel Fabbro:** None Reported

**Florence Joly-Lobbedez:** Consultant/Advisory Role: Sanofi, Novartis, Roche, Astellas, Janssen, Pfizer

**Arnulf Stenzl:** Consultant/Advisory Role: Novartis, Amgen, Alere; Research Funding/Contracted Research: Novartis

**Alere Jörg Pinkert:** Employment/Leadership Position: Bayer; Ownership Interest: Bayer employee stock and stock options

**Thomas Schmelter:** Employment/Leadership Position: Bayer Pharma AG; Ownership Interest: Stocks of Bayer Pharma AG

**Patricia Pautier:** Consultant/Advisory Role: Roche

## Author Summary: Abstract and Brief Discussion

### Background

Peripheral neuropathy (PN) is a recognized side effect of microtubule-targeting agents and the most clinically relevant toxicity observed with the epothilone sagopilone (SAG). Studies suggest that acetyl-L-carnitine (ALC) may prevent chemotherapy-induced PN. We conducted a prospective, placebo (PBO)-controlled, double-blind, randomized trial to investigate the safety and efficacy of ALC for the prevention of SAG-induced PN.

## Methods

Patients with ovarian cancer (OC) or castration-resistant prostate cancer (CRPC) and no evidence of neuropathy received SAG (16 mg/m<sup>2</sup> intravenously over 3 hours every 3 weeks) with ALC (1,000 mg every 3 days) or placebo (PBO). The primary endpoint was incidence of PN within six of fewer cycles in both treatment groups.

## Results

Overall, 150 patients enrolled (98 OC patients, 52 CRPC patients), with 75 per treatment arm. No significant difference in overall PN incidence was observed between treatment arms. The incidence of grade  $\geq 3$  PN was significantly lower in the ALC arm in OC patients. Median duration of neuropathy was similar between treatment arms. The best overall response (according to the modified Response Evaluation Criteria in Solid Tumors), response according to tumor markers, time-to-event variables, and discontinuations because of adverse events (AEs) were comparable between treatment arms.

## Conclusions

Administration of ALC with SAG did not result in a significant difference in overall PN incidence compared with a PBO. OC patients in the SAG/ALC arm had a significantly lower incidence of grade 3 or 4 PN compared with OC patients in the SAG/PBO arm.

## Discussion

In this first randomized, prospective study of ALC for the prevention of chemotherapy-induced PN, no significant difference was observed in PN incidence between the two treatment arms. Consistent with previous clinical findings, however, ALC appeared to significantly reduce the incidence of high-grade neuropathy. Consequently, ALC given concurrently with SAG appears to significantly reduce the intensity of neurotoxicity but not the incidence. The reasons for the greater reduction in high-grade neuropathy in patients with recurrent OC, compared with those with CRPC, are not entirely clear. Almost all patients in this study had received prior taxane-based therapy, and it is possible that some patients developed taxane-induced PN diagnosed only after taxane cessation. A previously published SAG clinical study of patients with OC, however, suggested that SAG-induced PN does not appear to correlate with prior taxane treatment [1]. Our study supports previously reported safety findings that demonstrated SAG to be well tolerated by patients with CRPC or OC. PN was the most commonly reported grade  $\geq 3$  AE in our study, as also reported in earlier studies [1–6]. Incidence and types of AEs were broadly similar across treatment arms, with slightly more serious AEs and grade 3 or 4 AEs reported in the SAG/PBO arm. Few patients reported ALC-related AEs, and, consistent with previous studies, ALC appears to be very well tolerated [7, 8]. In our study, there was no notable difference in response, progression-free survival, or time to progression between the two treatment arms. This finding suggests that, consistent with previous clinical reports in patients treated with taxanes, ALC did not appear to compromise the antitumor activity of SAG [7, 8]. In conclusion, our study findings are encouraging regarding the therapeutic role of ALC in combination with SAG.

## Trial Information

|                                      |                                  |
|--------------------------------------|----------------------------------|
| <b>Disease:</b>                      | Ovarian cancer                   |
| <b>Disease:</b>                      | Prostate Cancer                  |
| <b>Stage of disease / treatment:</b> | Metastatic / Advanced            |
| <b>Prior Therapy:</b>                | No designated number of regimens |
| <b>Type of study - 1:</b>            | Phase II                         |
| <b>Type of study - 2:</b>            | Randomized                       |

**Additional Details of Endpoints or Study Design:**

This study was designed to evaluate the use of acetyl-L-carnitine (ALC) for the prevention of sagopilone-induced peripheral neuropathy (PN) in patients with OC or CRPC. The primary objective was to determine if the addition of ALC to sagopilone resulted in a lower overall incidence of PN compared with sagopilone plus placebo. Secondary objectives were to assess the safety and efficacy of sagopilone plus ALC. Eligible patients were randomized to receive a 3-hour infusion every 3 weeks of 16 mg/m<sup>2</sup> sagopilone plus either oral ALC (1000 mg three times a day) or an oral ALC-matching placebo (three times a day) for six treatment courses, and more than six based on investigator decision. ALC/placebo was continued for 30–33 days following the last sagopilone treatment. Patients with CRPC also received oral prednisone (5 mg every 2 days), as low-dose prednisone is known to improve quality of life in patients receiving chemotherapy.

**Investigator's Analysis:**

Correlative endpoints not met but clinical activity observed

## Drug Information

**Drug 1:**

**Generic/Working name:** Sagopilone

**Trade name:**

**Company name:**

**Drug type:**

**Drug class:** Microtubule-targeting agent

**Dose:** per

**Route:**

**Schedule of Administration:**

**Drug 2:**

**Generic/Working name:** Acetyl-L-carnitine (ALC)

**Trade name:**

**Company name:**

**Drug type:**

**Drug class:** Other

**Dose:** per

**Route:**

**Schedule of Administration:**

## Patient Characteristics

**Number of patients, male:** 52

**Number of patients, female:** 98

**Stage:** Patients with prostate cancer: Median Gleason total score = 8 (range, 4–10). Patients with ovarian cancer: International Federation of Gynecology and Obstetrics staging system Stage I = 7 (7%), Stage II = 6 (6%), Stage III = 68 (69%) and Stage IV = 17 (18%)

**Age:** Median (range): 62 (29–82) years

**Number of prior systemic therapies:** Median (range): Not Collected

**Performance Status:** ECOG  
● 0 —  
● 1 —  
● 2 —  
● 3 —  
● unknown —

**Other:** Not Collected

**Cancer Types or Histologic Subtypes:**

## Primary Assessment Method

### Experimental Arm: Total Patient Population

**Number of patients screened:** 188

**Number of patients enrolled:** 150

**Number of patients evaluable for toxicity:** 150

**Number of patients evaluated for efficacy:** 150

**Evaluation method:** Other

### Control Arm: Total Patient Population

**Evaluation method:** Other

## Adverse Events

| Name | *NC/NA | 1 | 2 | 3 | 4 | 5 | All Grades |
|------|--------|---|---|---|---|---|------------|
|------|--------|---|---|---|---|---|------------|

\*No Change from Baseline/No Adverse Event

## Assessment, Analysis, and Discussion

**Completion:** Study completed

**Pharmacokinetics / Pharmacodynamics:** Not Collected

**Investigator's Assessment:** Correlative endpoints not met but clinical activity observed

### Discussion

The REASON study is the first randomized, prospective clinical trial to examine the use of ALC for the prevention of sagopilone-induced PN. The primary endpoint was not met, as no statistically significant difference in PN incidence was observed between the two treatment arms. However, the incidence of higher-grade neuropathies was significantly reduced by ALC, with the most marked effect in patients with recurrent OC. The clinical features of CIPN depend on the chemotherapy agent used and range from predominantly motor or sensory to sensory-motor neuropathies, with or without autonomic impairment [9]. CIPN onset can result in chronic discomfort and severe impediment of quality of life. CIPN is an ongoing issue in the management of oncology patients. Survival rates for treated patients are improving, and the presence of debilitating or long-lasting iatrogenic adverse events (AEs) is a recognized challenge requiring new strategies. The reduction of CIPN incidence by ALC was initially demonstrated pre-clinically [10]. Subsequent clinical studies reported a reduction in CIPN severity with concurrent ALC treatment by at least one grade in patients with cisplatin- or paclitaxel-induced CIPN, without apparent effect on antitumor activity [7, 8]. However, in a randomized phase III study

investigating ALC for the prevention of neuropathy in patients receiving adjuvant taxane-based chemotherapy for stage I/II/IIIA breast cancer, there was no evidence that ALC improved CIPN [11]. In our study, no significant difference was observed in PN incidence between the two treatment arms. However, consistent with previous clinical findings, ALC did appear to significantly reduce the incidence of high-grade neuropathy. Therefore, ALC given concurrently with sagopilone appears to significantly reduce the intensity of neurotoxicities, but not the incidence. Reasons for the greater reduction in high-grade neuropathy in patients with recurrent OC, compared with those with CRPC, are not entirely clear. Almost all patients in this study had received prior taxane-based therapy, and it is possible that some patients developed taxane-induced PN diagnosed only after taxane cessation. However, a previously published sagopilone clinical study of patients with OC suggested that sagopilone-induced PN does not appear to correlate with prior taxane treatment [1]. Findings may be influenced by other factors, including agents known to be associated with CIPN, gender, or disease. Other previous sagopilone studies have reported a PN incidence of 74% in taxane-naïve CRPC patients and 76% in previously treated OC patients [2, 12]. Overall, our study supports previously reported safety findings that demonstrated sagopilone to be well tolerated in patients with CRPC or OC. PN was the most commonly reported grade  $\geq 3$  AE in our study, as also reported in earlier studies [1–6]. The incidence and type of AEs were broadly similar across treatment arms, with slightly more serious AEs and grade 3 or 4 AEs reported in the sagopilone/placebo arm. Few patients reported ALC-related AEs and, consistent with previous studies, ALC appears to be very well tolerated [7, 8]. In our study, there was no notable difference in response, progression-free survival, or time to progression between the two treatment arms, suggesting that, consistent with previous clinical reports in patients treated with taxanes, ALC did not appear to compromise the antitumor activity of sagopilone [7, 8]. In conclusion, our study findings are encouraging regarding the therapeutic role of ALC in combination with sagopilone. The addition of ALC to primary chemotherapy agents to minimize CIPN warrants further and wider investigation.

## References

1. Rustin G, Reed N, Jayson GC et al. A phase II trial evaluating two schedules of sagopilone (ZK-EPO), a novel epothilone, in patients with platinum-resistant ovarian cancer. *Ann Oncol* 2011;**22**:2411–2416.
2. Beer TM, Smith DC, Hussain A et al. Phase II study of first-line sagopilone combined with prednisone in patients with metastatic castration-resistant prostate cancer (CRPC). *J Clin Oncol (Meeting Abstracts)* 2009;**27**:Abstract 5059.
3. Gauler TC, Christoph DC, Gamarra F et al. Phase I trial of the novel epothilonesagopilone (ZK-EPO) in combination with cisplatin as first-line therapy in patients with extensive-disease small-cell lung cancer (ED-SCLC). *J Clin Oncol (Meeting Abstracts)* 2008;**26**:Abstract 19081.
4. McMeekin S, Patel R, Verschraegen C et al. Phase I/II study of sagopilone (ZK-EPO) plus carboplatin in women with recurrent platinum-sensitive ovarian cancer. *Ann Oncol* 2008;**19** (Suppl 8):Abstract 665O.
5. Schmid P, Kiewe P, Possinger K et al. Phase I study of the novel, fully synthetic epothilonesagopilone (ZK-EPO) in patients with solid tumors. *Ann Oncol* 2010;**21**:633–639.
6. Wenk D, DeConti RC, Urbas P et al. Phase II trial of sagopilone (ZK-EPO), a novel epothilone, in patients with metastatic melanoma. *J Clin Oncol (Meeting Abstracts)* 2008;**26**:Abstract 9046.
7. Bianchi G, Vitali G, Caraceni A et al. Symptomatic and neurophysiological responses of paclitaxel- or cisplatin-induced neuropathy to oral acetyl-L-carnitine. *Eur J Cancer* 2005;**41**:1746–1750.
8. Maestri A, De Pasquale Ceratti A, Cundari S et al. A pilot study on the effect of acetyl-L-carnitine in paclitaxel- and cisplatin-induced peripheral neuropathy. *Tumori* 2005;**91**:135–138.
9. Cavaletti G, Marmiroli P. Chemotherapy-induced peripheral neurotoxicity. *Expert Opin Drug Saf* 2004;**3**:535–546.
10. Pisano C, Pratesi G, Laccabue D et al. Paclitaxel and cisplatin-induced neurotoxicity: a protective role of acetyl-L-carnitine. *Clin Cancer Res* 2003;**9**:5756–5767.
11. Hershman DL, Unger JM, Crew KD et al. SWOG S0715: randomized placebo-controlled trial of acetyl-L-carnitine for the prevention of taxane-induced neuropathy during adjuvant breast cancer therapy. *J Clin Oncol (Meeting Abstracts)* 2012;**30**:Abstract 9018.
12. McMeekin S, Patel R, Verschraegen C et al. Phase I/II study of sagopilone (ZK-EPO) plus carboplatin in women with recurrent platinum-sensitive ovarian cancer. *Br J Cancer* 2012;**106**:70–76.

## Figures and Tables

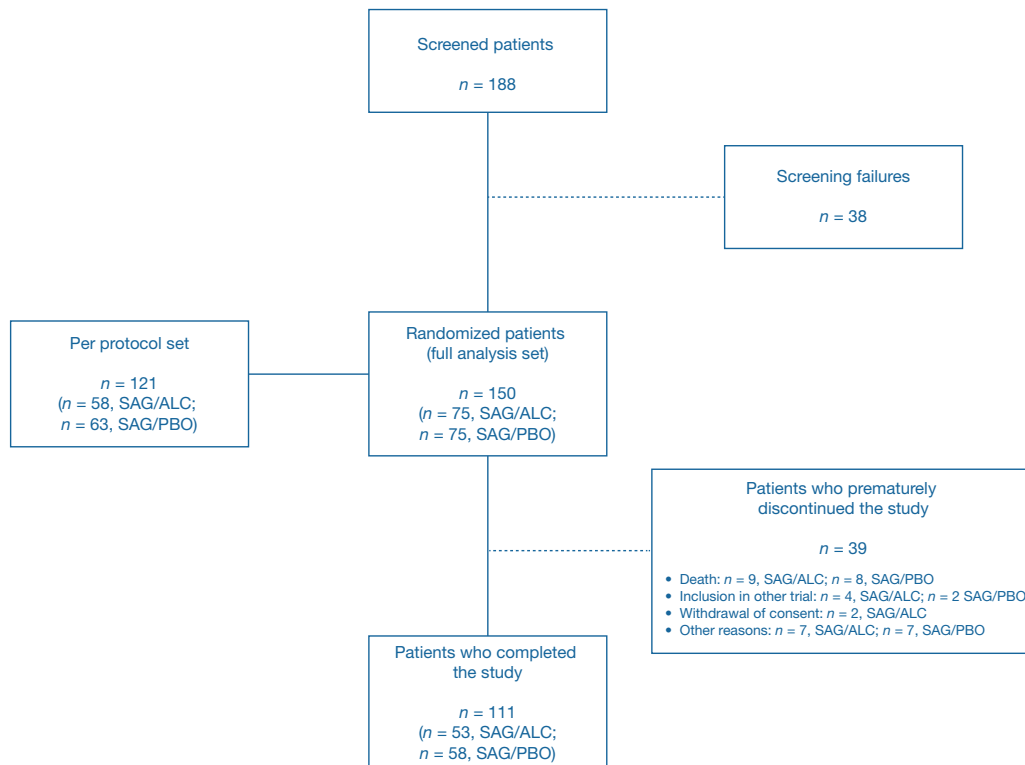

**Figure 1.** CONSORT diagram.

Abbreviations: ALC, acetyl-L-carnitine; PBO, placebo; SAG, sagopilone.

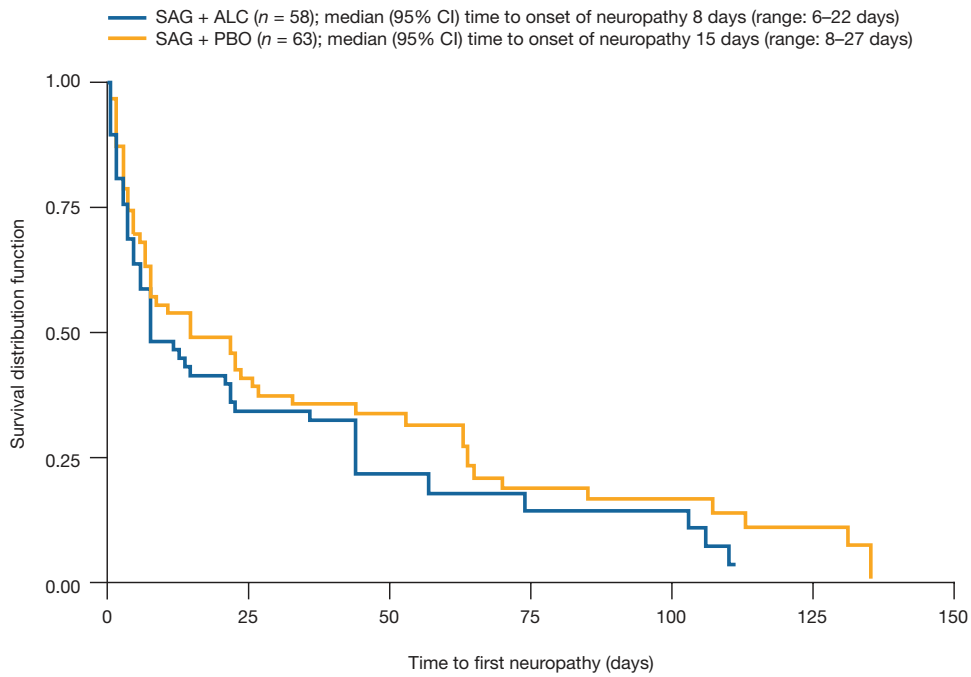

**Figure 2.** Time to recovery from neuropathy (per protocol set).  
 Abbreviations: ALC, acetyl-L-carnitine; CI, confidence interval; PBO, placebo; SAG, sagopilone.

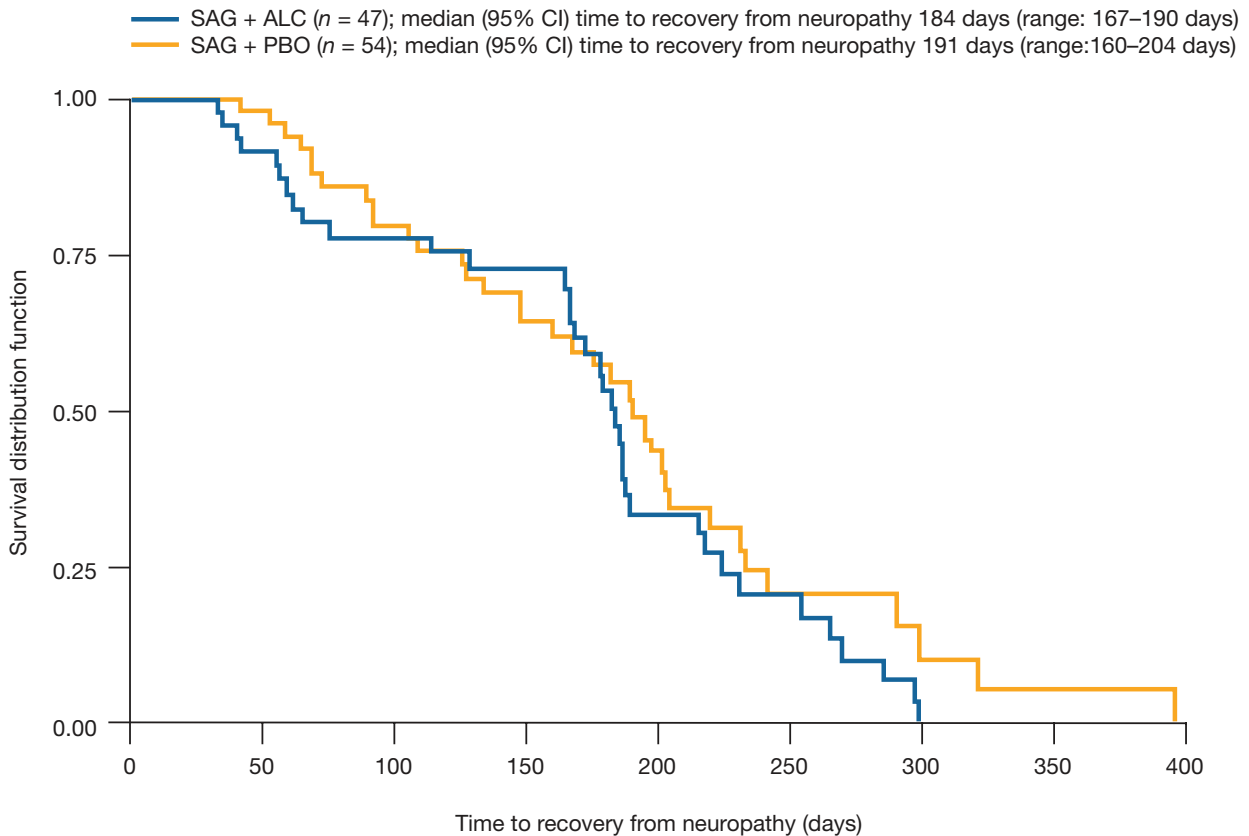

**Figure 3.** Time to onset of neuropathy (per protocol set).  
 Abbreviations: ALC, acetyl-L-carnitine; CI, confidence interval; PBO, placebo; SAG, sagopilone.

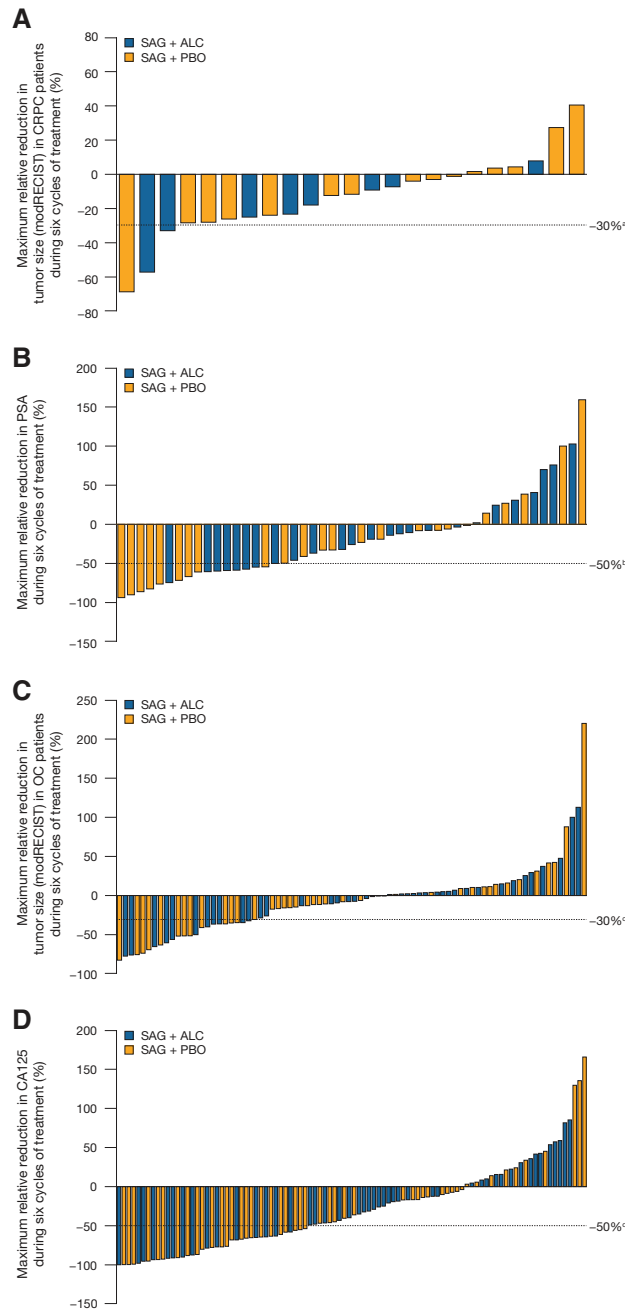

**Figure 4.** Maximum relative reduction in: A) tumor size by modRECIST in CRPC patients; B) PSA levels; C) tumor size by modRECIST in OC patients; and D) CA125 levels, during six cycles of treatment (full analysis set). <sup>a</sup>Indicates a reduction of over 30% in tumor size compared with baseline; <sup>b</sup>Response was defined as a 50% reduction in PSA within 3 months compared with baseline; <sup>c</sup>Indicates a reduction of over 30% in tumor size compared with baseline; <sup>d</sup>Response was defined as a 50% reduction in CA125 within 3 months compared with baseline.

Abbreviations: ALC, acetyl-L-carnitine; CRPC, castration-resistant prostate cancer; modRECIST, modified Response Evaluation Criteria in Solid Tumors; OC, ovarian cancer; PBO, placebo; PSA, prostate-specific antigen; SAG, sagopilone.

[Click here](#) to access other published clinical trials.
